# Supplementary material for: Micronutrient Gaps in Three Commercial Weight-Loss Diet Plans
Source: PubMed Central journal article supplement (PMC5793336; doi:10.3390/nu10010108), 2018-01-20
Supplement: nutrients-10-00108-s001.pdf [file nutrients-10-00108-s001.pdf]

**Supplementary Table 1: Top five most reviewed weight-loss diet books on Amazon.com.**

| <b>Ranking *</b> | <b>Weight-loss Diet Books</b>                                                                                             | <b>No. of Reviews on Amazon.com</b> |
|------------------|---------------------------------------------------------------------------------------------------------------------------|-------------------------------------|
| 1                | Smith JJ. 10-Day Green Smoothie Cleanse. 2014.                                                                            | 7613                                |
| 2                | Davis W, Tom Weiner. Wheat Belly: 10-Day Grain Detox: Reprogram Your Body for Rapid Weight Loss and Amazing Health. 2011. | 5669                                |
| 3                | Fuhrman J, Oz M. <b>Eat to Live: The Amazing Nutrient-Rich Program for Fast and Sustained Weight Loss.</b> 2005.          | 4510                                |
| 4                | Hartwig D, Hartwig M. It Starts With Food: Discover the Whole30 and Change your Life in Unexpected Ways. 2014.            | 3306                                |
| 5                | Pomroy H, Eve Adamson E. <b>The Fast Metabolism Diet:</b> Eat More Food and Lose More Weight. 2013.                       | 3228                                |

\* A search on Amazon.com was conducted on December 18, 2016 and rankings were based on number of reviews on Amazon.com.
